# Supplementary material for: The Role of Mental Imagery in Depression: Negative Mental Imagery Induces Strong Implicit and Explicit Affect in Depression
Source: PubMed Central journal article supplement (PMC4493655; doi:10.3389/fpsyt.2015.00094), 2015-07-07
Supplement: data_sheet_1.pdf [file data_sheet_1.pdf]

## Appendix

Word stimuli from the Berlin Affective Word List Reloaded (BAWL-R) and picture stimuli from the International Affective Picture System (IAPS; slide number)

| <b>valence</b>  | <b>Mental Imagery</b> |                 | <b>Verbal Processing</b> |                 | <b>Pictures</b> |                 |
|-----------------|-----------------------|-----------------|--------------------------|-----------------|-----------------|-----------------|
|                 | <b>implicit</b>       | <b>explicit</b> | <b>implicit</b>          | <b>explicit</b> | <b>implicit</b> | <b>explicit</b> |
| <i>negative</i> | bomb                  | alarm clocks    | bill                     | dead            | 2095            | 2053            |
|                 | cemetery              | bacterium       | carrion                  | decay           | 2301            | 2205            |
|                 | cockroach             | coffin          | contusion                | fat             | 2688            | 2683            |
|                 | devil                 | crutch          | corpse                   | moan            | 3301            | 2710            |
|                 | grave                 | defendant       | faint                    | muck            | 6834            | 2981            |
|                 | hatchet               | dungeon         | moth                     | munition        | 9250            | 3103            |
|                 | illness               | escape          | murder                   | nausea          | 9423            | 6821            |
|                 | prison                | gurney          | muzzle                   | quarrel         | 9429            | 8485            |
|                 | mosquito              | thief           | soldier                  | rival           | 9611            | 9184            |
|                 | waste                 | weapon          | wart                     | urn             | 9940            | 9620            |
| <i>neutral</i>  | battery               | barrel          | boot                     | aquarium        | 2191            | 2272            |
|                 | belt                  | bottle          | carpet                   | carton          | 2377            | 2308            |
|                 | document              | broom           | fishing rod              | comb            | 2575            | 2441            |
|                 | excavator             | cupboard        | flag                     | drum            | 2635            | 2485            |
|                 | folder                | curve           | lecture                  | finger          | 5534            | 2506            |
|                 | glass                 | microphone      | pot                      | glue            | 7001            | 7019            |
|                 | nose                  | screw           | sponge                   | hammer          | 7057            | 7021            |
|                 | scissors              | shirt           | spoon                    | heel            | 7058            | 7037            |
|                 | stairs                | stamp           | stone                    | stem            | 7287            | 7513            |
|                 | vest                  | suitcase        | wall*                    | tray            | 7595            | 8325            |
| <i>positive</i> | birthday              | admirer         | birth                    | chocolate       | 2152            | 1710            |
|                 | celebration           | applause        | chick                    | ecstasy         | 2340            | 2045            |
|                 | eroticism             | cash            | cheers                   | fun             | 2345            | 2208            |
|                 | flirt                 | hero            | cookie                   | journey         | 4597            | 2347            |
|                 | gift                  | medal           | euphoria                 | luxury          | 5210            | 2550            |
|                 | hit                   | palace          | joy                      | passion         | 5621            | 4599            |
|                 | ice cream             | party           | ocean                    | pearl           | 5623            | 4659            |
|                 | cake                  | rabbit          | sport                    | sapphire        | 5833            | 5781            |
|                 | vacation              | sun             | strawberry               | shower          | 8370            | 5825            |
|                 | winner                | victory         | treasure                 | spring          | 8380            | 8492            |

\* The used word “Mauer” in German is unambiguous (e.g., the Berlin wall), in contrast to the English translation “wall” which can have different meanings.
